# Supplementary material for: Anisotropic thermal and electrical transport properties induced high thermoelectric performance in an Ir2Cl2O2 monolayer
Source: Royal Society of Chemistry journal article supplement (doi:10.1039/d1cp04971b), 2022-01-01
Supplement: d1cp04971b1.pdf [file d1cp04971b1.pdf]

# Supplementary Material

## **Anisotropic Thermal and Electrical Transport Properties Induced High Thermoelectric Performance in Ir<sub>2</sub>Cl<sub>2</sub>O<sub>2</sub> Monolayer**

Qiang Fan<sup>1</sup>, Jianhui Yang<sup>2</sup>, Hangbo Qi<sup>3</sup>, Linfeng Yu<sup>5</sup>, Guangzhao Qin<sup>5</sup>, Zhehao Sun<sup>6</sup>,  
Chen Shen<sup>4,\*</sup> and Ning Wang<sup>3,\*</sup>

<sup>1</sup> *School of Electronic and Material Engineering, Leshan Normal University, Leshan 614004, Sichuan, PR China*

<sup>2</sup> *School of Mathematics and Physics, Leshan Normal University, Leshan 614004, Sichuan, PR China*

<sup>3</sup> *School of Physics, University of Electronic Science and Technology of China, Chengdu 610054, P. R. China*

<sup>4</sup> *Institute of Materials Science, Technical University of Darmstadt, Darmstadt 64287, Germany*

<sup>5</sup> *State Key Laboratory of Advanced Design and Manufacturing for Vehicle Body, College of Mechanical and Vehicle Engineering, Hunan University, Changsha 410082, P. R. China*

<sup>6</sup> *Research School of Chemistry, Australian National University, Canberra, ACT 2601, Australia.*

\*Correspondence: [chenshen@tmm.tu-darmstadt.de](mailto:chenshen@tmm.tu-darmstadt.de) (Chen Shen); [ningwang0213@163.com](mailto:ningwang0213@163.com) (Ning Wang)

### 1. Phonon Vibrational Mode

As shown in Figure 2 in main text, ZA and TA modes narrow down and become almost degenerate in the X-Y path. Similar phenomena can be observed between LA and the lowest optical branch. This implies that strong coupling exists in acoustic-acoustic and acoustic-optical modes, leading to low thermal conductivity. Similar phenomena can

be observed between LA and the lowest optical branch. Through visualization technology, we obtain the vibration modes of high symmetry points on the degenerate phonon band, as shown in the following figures. The doubly degenerate phonon band of ZA/TA is associated with the  $E'$  mode and that of LA/Opt is the  $E''$  mode. 'E' indicates that the representation is double-degenerate. The prime (') and double prime (``) in the symmetry representation label represents symmetric or anti-symmetric with respect to a mirror plane horizontal to the principal rotational axis.

**Table S1 The corresponding relationship between the supplementary picture, energy band, high symmetry point and view plane.**

| Band   | ZA/TA degenerate band |           |           |           |           |           |           |           |           | LA/Opt degenerate band |           |           |           |           |           |           |           |           |
|--------|-----------------------|-----------|-----------|-----------|-----------|-----------|-----------|-----------|-----------|------------------------|-----------|-----------|-----------|-----------|-----------|-----------|-----------|-----------|
|        | X                     |           |           | S         |           |           | Y         |           |           | X                      |           |           | S         |           |           | Y         |           |           |
| Plane  | <i>bc</i>             | <i>ac</i> | <i>ab</i> | <i>bc</i> | <i>ac</i> | <i>ab</i> | <i>bc</i> | <i>ac</i> | <i>ab</i> | <i>bc</i>              | <i>ac</i> | <i>ab</i> | <i>bc</i> | <i>ac</i> | <i>ab</i> | <i>bc</i> | <i>ac</i> | <i>ab</i> |
| Figure | S1                    | S2        | S3        | S4        | S5        | S6        | S7        | S8        | S9        | S10                    | S11       | S12       | S13       | S14       | S15       | S16       | S17       | S18       |
